# Supplementary material
Source: publisher figshare collection journal article supplement (https://karger.figshare.com/articles/dataset/_/6188849)
Supplement: Supplementary file 2 [file 1]

Archive with 8 entries (8 files):
- UIN_201712029_1_4_supplementary_tables.docx
- UIN_201712029_1_4_supplementary_tables_PDF.PDF
- UIN_201712029_1_8_supplementary_figure1.jpg
- UIN_201712029_1_8_supplementary_figure1_PDF.PDF
- UIN_201712029_1_9_supplementary_figure_2.tif
- UIN_201712029_1_9_supplementary_figure_2_PDF.PDF
- UIN_201712029_1_s_10_RevisedMsFigures_SuppTablesFigures_clean.doc
- UIN_201712029_1_s_11_RevisedMsFigures_SuppTablesFigures_clean_PDF.pdf
