# Supplementary material
Source: publisher figshare collection journal article supplement (https://karger.figshare.com/articles/dataset/_/6188849)
Supplement: Supplementary file 2 [file 1 › UIN_201712029_1_4_supplementary_tables.docx]

**Supplemental table 1.** Clinical data and RQ values of testicular germ cell tumour patients

|  |  |  | **Tumour** | **RQ miR-371a-3p** | **RQ miR-371a-3p** | **RQ miR-371a-3p** | **RQ miR-371a-3p** | **RQ miR-371a-3p** | **RQ miR-371a-3p** | **RQ miR-371a-3p** |
| --- | --- | --- | --- | --- | --- | --- | --- | --- | --- | --- |
| **Patient ID** | **Age [years]** | **S/NS** | **size**  **[mm]** | **pre-**  **operative** | **4 h**  **postop.** | **8 h**  **postop.** | **10 h**  **postop.** | **24 h postop.** | **48 h postop.** | **72 h postop.** |
| **1** | **49** | **S** | **18** | **20.64** | **n.a** | **n.a.** | **n.a.** | **0.43** | **0.0** | **0.0** |
| **2** | **34** | **S** | **34** | **2035.26** | **n.a** | **n.a.** | **n.a.** | **48.47** | **5.79** | **2.54** |
| **3** | **31** | **S** | **68** | **1728.14** | **n.a** | **n.a.** | **n.a.** | **108.91** | **47.28** | **62.21** |
| **4** | **28** | **NS** | **9** | **12.3** | **n.a** | **n.a.** | **n.a.** | **0.0** | **0.0** | **0.0** |
| **5** | **53** | **S** | **48** | **182.91** | **n.a** | **n.a.** | **n.a.** | **7.25** | **0.0** | **0.0** |
| **6** | **47** | **S** | **8** | **0.0** | **n.a** | **n.a.** | **n.a.** | **0.0** | **0.0** | **0.0** |
| **7** | **66** | **S** | **7** | **58.53** | **n.a** | **n.a.** | **n.a.** | **1.61** | **0.0** | **0.0** |
| **8** | **41** | **S** | **56** | **950.14** | **n.a** | **n.a.** | **n.a.** | **14.58** | **4.86** | **3.12** |
| **9** | **34** | **S** | **47** | **1620.25** | **n.a** | **n.a.** | **n.a.** | **32.72** | **9.7** | **1.94** |
| **10** | **n.a.** | **S** | **54** | **4347.59** | **n.a** | **n.a.** | **n.a.** | **78.79** | **1.47** | **5.61** |
| **11** | **47** | **NS** | **14** | **45.86** | **n.a** | **n.a.** | **n.a.** | **3.92** | **2.71** | **n.a.** |
| **12** | **29** | **S** | **16** | **54.38** | **n.a** | **n.a.** | **n.a.** | **0.0** | **0.0** | **0.0** |
| **13** | **47** | **NS** | **24** | **354.83** | **n.a** | **n.a.** | **n.a.** | **39.56** | **24.61** | **11.69** |
| **14** | **52** | **S** | **15** | **2.57** | **n.a** | **n.a.** | **n.a.** | **0.0** | **0.0** | **0.0** |
| **15** | **34** | **S** | **15** | **2.29** | **n.a** | **n.a.** | **n.a.** | **0.0** | **0.0** | **n.a.** |
| **16** | **41** | **S** | **45** | **607.61** | **n.a** | **n.a.** | **n.a.** | **14.18** | **2.1** | **0.63** |
| **17** | **33** | **S** | **44** | **712.63** | **n.a** | **n.a.** | **n.a.** | **22.53** | **18.8** | **4.37** |
| **18** | **39** | **S** | **62** | **919.69** | **n.a** | **n.a.** | **n.a.** | **2.4** | **0.89** | **0.41** |
| **19** | **60** | **S** | **31** | **71.11** | **n.a** | **n.a.** | **n.a.** | **0.0** | **0.0** | **0.0** |
| **20** | **57** | **S** | **40** | **101.83** | **n.a** | **n.a.** | **n.a.** | **4.59** | **5.71** | **n.a.** |
| **21** | **34** | **S** | **32** | **282.09** | **n.a** | **n.a.** | **n.a.** | **14.44** | **3.84** | **0.46** |
| **22** | **62** | **S** | **35** | **1081.69** | **941.63** | **409.07** | **n.a.** | **17.47** | **22.76** | **n.a.** |
| **23** | **35** | **S** | **14** | **45.8** | **n.a.** | **n.a.** | **0.82** | **0.0** | **0.0** | **n.a.** |
| **24** | **27** | **NS** | **16** | **154.07** | **70.13** | **n.a.** | **n.a.** | **5.2** | **2.12** | **n.a.** |

NS: Nonseminoma; S: Seminoma; RQ: Relative quantity; n.a.: not available

**Supplemental table 2.** Clinical data and RQ values of controls

| **Control ID** | **Age [years]** | **RQ miR-371a-3p** |
| --- | --- | --- |
| **1** | **52** | **0.0** |
| **2** | **26** | **0.0** |
| **3** | **28** | **0.0** |
| **4** | **23** | **0.0** |
| **5** | **43** | **0.0** |
| **6** | **18** | **1.58** |
| **7** | **49** | **0.0** |
| **8** | **36** | **0.0** |
| **9** | **18** | **0.0** |
| **10** | **33** | **0.0** |
| **11** | **18** | **0.37** |
| **12** | **22** | **0.0** |
| **13** | **50** | **2.78** |
| **14** | **24** | **0.0** |
| **15** | **22** | **0.0** |
| **16** | **33** | **1.47** |
| **17** | **47** | **0.36** |
| **18** | **54** | **0.0** |
| **19** | **54** | **0.0** |
| **20** | **48** | **1.16** |

RQ: Relative quantity
