# Supplementary material
Source: publisher figshare collection journal article supplement (https://karger.figshare.com/articles/dataset/_/6188849)

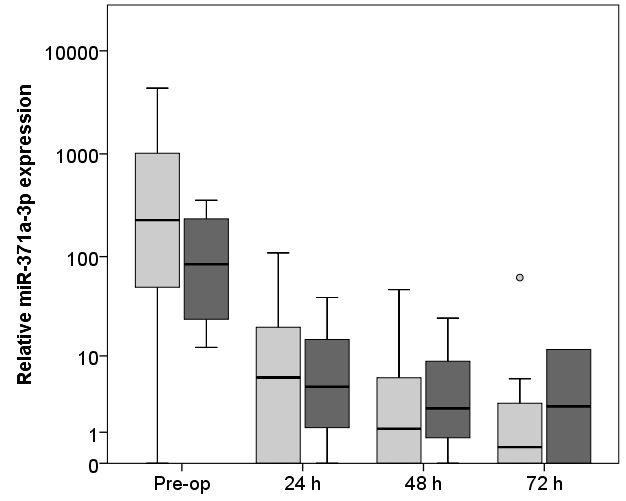

Supplement: Supplementary file 2 [file 1 › UIN_201712029_1_8_supplementary_figure1.jpg]

**Relative miR-371a-3p expression**

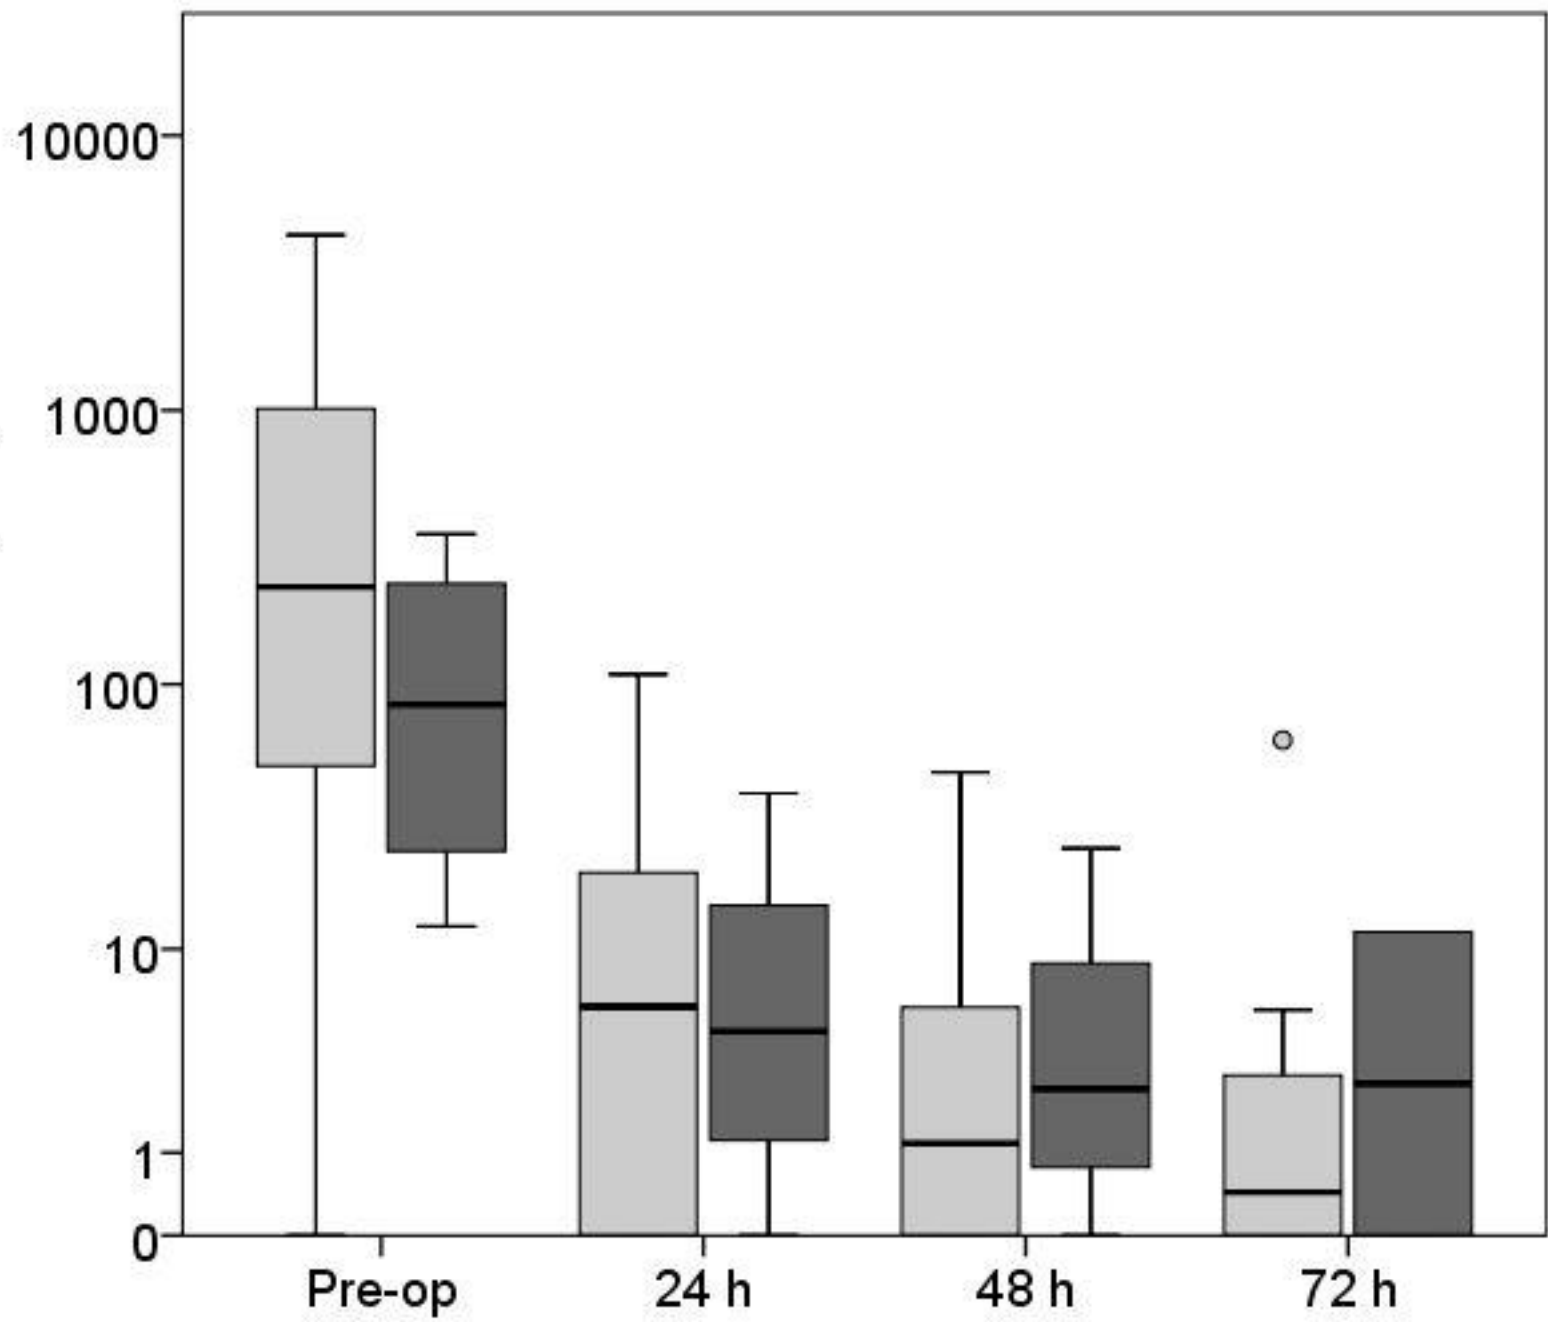

Supplement: Supplementary file 2 [file 1 › UIN_201712029_1_8_supplementary_figure1_PDF.PDF]

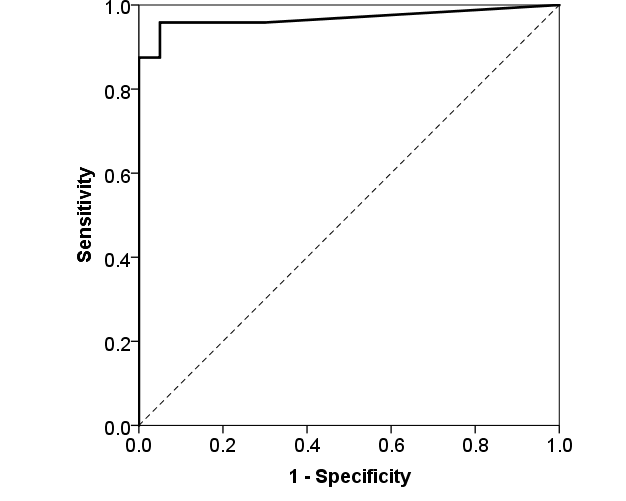

Supplement: Supplementary file 2 [file 1 › UIN_201712029_1_9_supplementary_figure_2.tif]

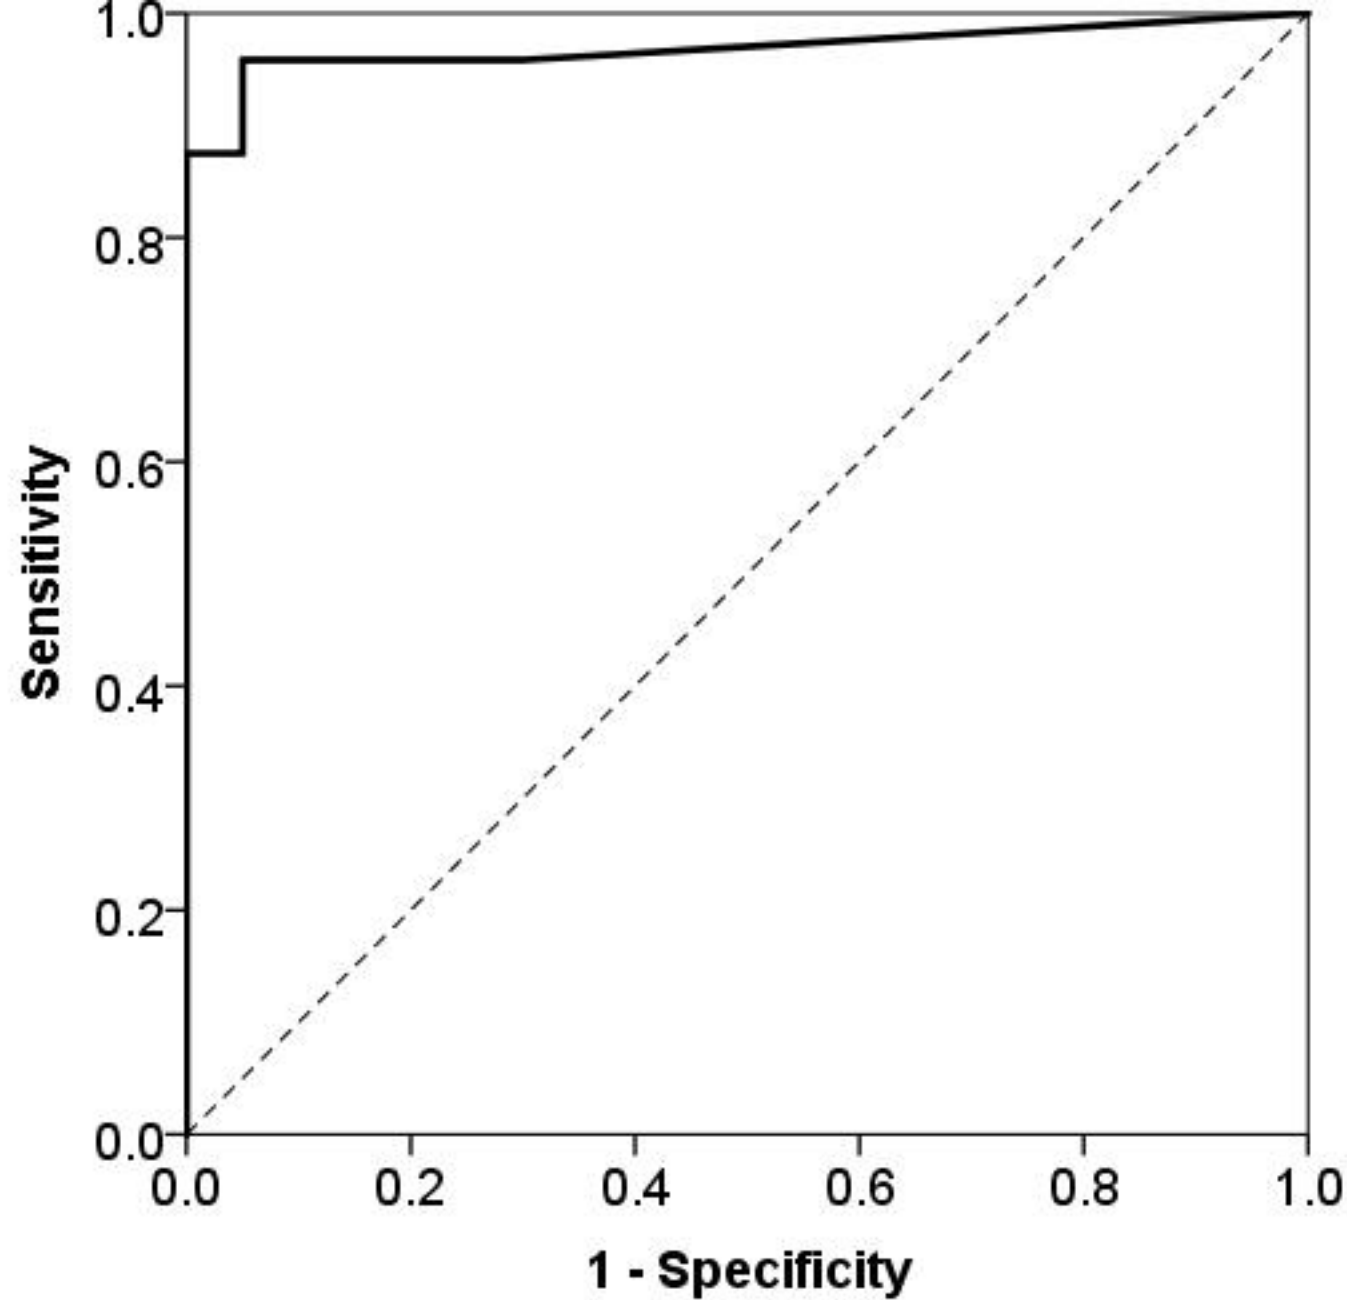

Supplement: Supplementary file 2 [file 1 › UIN_201712029_1_9_supplementary_figure_2_PDF.PDF]
